# Supplementary material for: ISWFM-NSCS v2.0: advancing the internal solitary wave forecasting model with background currents and horizontally inhomogeneous stratifications
Source: Copernicus journal article supplement (doi:10.5194/gmd-2024-165), 2024-12-20
Supplement: Supplementary file [file gmd-2024-165-AC1-supplement.pdf]

## **Response letter to the Chief-Editor-Comment**

You have not published a full version of the ISWFM-NSCS v2.0 model. This is forbidden by our policy, and your manuscript should not have been accepted for Discussions because of it. All the code must be published openly and freely to anyone before submission of a manuscript. Also, you have not published a version of MITgcm in a permanent repository that we can accept.

Therefore, we are granting you a short time to solve this situation. You have to reply to this comment in a prompt manner with the information for the repositories containing all the models, and code that you use to produce and replicate your manuscript. The reply must include the link and permanent identifier (e.g. DOI). Also, any future version of your manuscript must include the modified section with the new information.

### ***Response:***

We appreciate your comments on our code repository. According to your suggestion, we have read the code and data policy of GMD in detail, and have added all model code on the Zenodo repository with the DOI number <https://doi.org/10.5281/zenodo.14841770>.

Therefore, the “Code and data availability” is now rewritten as “The MODIS satellite imagery can be freely downloaded from the NASA Worldview website (<https://worldview.earthdata.nasa.gov>, last access: 11 July 2024, Plato et al., 2019). The input files, including initial and boundary conditions, as well as the corresponding output data for ISWFM-NSCS v2.0, are freely accessible through an open-access data repository available at <https://doi.org/10.5281/zenodo.14841770> (Gong, 2025, last access: 10 February 2025)”.
