# Supplementary material for: ISWFM-NSCS v2.0: advancing the internal solitary wave forecasting model with background currents and horizontally inhomogeneous stratifications
Source: Copernicus journal article supplement (doi:10.5194/gmd-2024-165), 2024-12-20
Supplement: Supplementary file [file gmd-2024-165-AC3-supplement.pdf]

## Response letter to the Chief-Editor-Comment

The MITgcm license (<https://github.com/MITgcm/MITgcm/blob/master/LICENSE.txt>), which you should have read and know, as you are using the model and one would expect that you know what you can do or not with it, clearly states that you can redistribute the code. Therefore, you can and must store the MITgcm version that works with your developed code in a permanent repository, and provide its details, link and permanent handle (e.g. DOI). In this regard, in the manuscript, you should indicate with what MITgcm version is compatible your code (it could happen that it is not compatible with a future version), and in the Code Availability section, instead of the MITgcm webpage that you currently mention, you should include the new repository that you set up with the frozen version of the code that you use here.

### *Response:*

We appreciate your comments on our code repository. According to your suggestion, we have read the MITgcm license in detail, and have added required MITgcm code on the Zenodo repository with the DOI number <https://doi.org/10.5281/zenodo.14847454>.

Therefore, the “Code and data availability” is now rewritten as “The MODIS satellite imagery can be freely downloaded from the NASA Worldview website (<https://worldview.earthdata.nasa.gov>, last access: 11 July 2024, Plato et al., 2019). The code of Massachusetts Institute of Technology general circulation model for ISWFM-NSCS v2.0 can be accessed at <https://doi.org/10.5281/zenodo.14847454> (last access: 11 February 2025). The input files, including initial and boundary conditions, as well as the corresponding output data for ISWFM-NSCS v2.0, are freely accessible through an open-access data repository available at <https://doi.org/10.5281/zenodo.14842090> (Gong, 2025, last access: 10 February 2025)”.
